# Supplementary material for: Relationship between childhood physical abuse and clinical severity of treatment-resistant depression in a geriatric population
Source: PLoS One. 2021 Apr 20;16(4):e0250148. doi: 10.1371/journal.pone.0250148 (PMC8057608; doi:10.1371/journal.pone.0250148)
Supplement: S1 Data — (XLSX) [file pone.0250148.s001.xlsx]

## Sheet: Feuil1
SEX	ARM	AGE	LOD	BFI_EXTR	BFI_AGRE	BFI_EMO	BFI_CONS	BFI_OUVE	Emotional_Abuse	Physical_Abuse	Sexual_Abuse	Emotional_Neglect	Physical_Neglect	CTQ_tot	Denial/minimization	QIDS_M0	ROSENB_M0	MADRS_M0	ATHFTot_M0	MARISTAT	EDULEVEL	STPROF
F	Trouble dépressif majeur	84	0	2.12	4.3	4	3.56	2.3	5	5	5	5	5	25	2	22	22	35	5	2	15	2
M	Trouble dépressif majeur	84	1	2.37	3.9	3.75	3.11	1.4	5	12	8	5	7	37	0	12	21	28	4	2	8	2
M	Trouble dépressif majeur	82	999															33	4
F	Trouble dépressif majeur	82	0	2.75	3.2	3.75	3.22	3	6	12	7	5	7	37	0	17	18	34	4	2	15	5
F	Trouble dépressif majeur	80	1						7	18	8	5	11	49	0	21	27	33	4	2	9	2
M	Trouble dépressif majeur	79	1	3.12	3.4	3.5	3.44	3.1								19	28	33	4	2	5	2
F	Trouble dépressif majeur	78	1	1.75	5	4.25	4	2.7	5	12	7	5	5	34	0	23	14	34	4	5	9	2
F	Trouble dépressif majeur	77	0	1.25	4.6	4.13	3.33	1.4	5	22	13	5	17	62	0	22	13	32	4	2	5	2
F	Trouble dépressif majeur	75	1	1.75	4	3.75	3.11	2.2	6	12	11	5	8	42	0	19	14	37	4	2	14	2
M	Trouble dépressif majeur	74	999	3.12	4.4	2.63	3.33	3.7	5	7	5	5	5	27	0	15	23	24	4	2	19	2
F	Trouble dépressif majeur	74	999	2.87	4.7	4.5	3.67	2.4								11	23	14		2	13	2
M	Trouble dépressif majeur	73	999	2.62	3.2			3	6	5	5	7	6	29	3	13	20	22	4	2	12	2
M	Trouble dépressif majeur	73	0	1.5	4.8	4.88	4.56	3.4	5	9	5	5	5	29	2	15	26	20	4	2	18	2
F	Trouble dépressif majeur	73	1	3.25	3.9	4	1.22	1.8	5	9	5	5	7	31	0	15	13	22	4
M	Trouble dépressif majeur	73	999	2.37	4.4	3.25	4.44	3	5	7	5	5	11	33	0	6	33	23		5	14	2
F	Trouble dépressif majeur	73	0															41	3
M	Trouble dépressif majeur	72	0	1.75	4.3	3.5	3.89	2.3	5	12	6	5	5	33	1	19	15	37	4	2	12	2
F	Trouble dépressif majeur	72	1	3.25	3.2	4	4.33	1.5	5	5	5	5	9	29	0	20	24	29	4	2	9	2
F	Trouble dépressif majeur	71	0	3	4.5	4.38	4	2.9	10	15	11	5	10	51	0	17		30
M	Trouble dépressif majeur	71	1	1.62	3.2	4.13	3.11	2.3								12	20	30	4	2	20	2
M	Trouble dépressif majeur	71	1															8	4	2	19	2
F	Trouble dépressif majeur	71	999						5	7	5	5	5	27	0	12	32	23		2	5	2
F	Trouble dépressif majeur	71	0	1.12	4	4.5	2.33	1.6	5	9	6	5	5	30	0	16	29	37	4	2	17	2
M	Trouble dépressif majeur	71	0	2.12	3.4	4.25	3	2.8	6	16	6	5	12	45	0	20	24	25	5	4	11	2
F	Trouble dépressif majeur	70	1	3.75	4	3.13	3.33	2.5	5	9	5	5	5	29	0	18	27	25	4	2	6	2
M	Trouble dépressif majeur	70	1	1.62	4	4.13	2.78	2	6	15	8	5	6	40	0	18	16	33	5	4	16	2
M	Trouble dépressif majeur	69	1	3.25	4.3	3	4.67	2.1	5	13	5	5	5	33	3	6	34	20		2	12	2
F	Trouble dépressif majeur	69	0	3	4.6	3.63	4.44	2.8	5	7	5	5	9	31	2	10	25	30	4	2	5	2
F	Trouble dépressif majeur	69	999	1	3.7	4.38	2.67	3.1	5	8	6	5	10	34	0	22	21	27		2	12	2
F	Trouble dépressif majeur	69	0	3.75	3.8	5	4.33	4.1	6	16	6	8	14	50	1	20	20	40	4	2	16	0
M	Trouble dépressif majeur	69	0	2	3.5	4.25	2.67	2.3	5	11	6	5	8	35	0	11	22	36	4	4	20	2
F	Trouble dépressif majeur	68	0	1.87	4.3	4.5	3.44	2.8	5	9	8	5	5	32	2	18	19	34	4	2	15	2
F	Trouble dépressif majeur	68	999	1.5	4.1	3.75	2.89	1.8	5	6	5	5	5	26	2	19	19	23	3	2	13	2
F	Trouble dépressif majeur	68	1						5	17	9	5	5	41	2	17	16	30	4	5	10	2
M	Trouble dépressif majeur	68	1	1	4.2	4.38	3	1.1	6	10	8	8	7	39	0	23	16	32	4	2	17	2
F	Trouble dépressif majeur	68	1	2.75	4.5	4	2.67	2.6	5	11	5	5	6	32	1	21	25	27	4	2	14	2
M	Trouble dépressif majeur	68	999	2.25	3.6	4.11	4	3.8	5	10	8	5	6	34	0	9	22	24	4	2	20	2
F	Trouble dépressif majeur	68	1	1.87	4.4	5	3.11	1.4	5	16	8	5	5	39	0	13	25	29	3	2	9	2
F	Trouble dépressif majeur	68	0	2.12	4.6	3.63	4.22	4.4	5	8	5	5	5	28	0	9	30	20	4	1	18	2
M	Trouble dépressif majeur	67	0	2	3.6	4.25	3.22	1.7	5	9	6	5	5	30	0	16		28	4	2	9	2
F	Trouble dépressif majeur	67	999	2.12	3.4			2.9	5	17	10	5	5	42	0	22	21	31	3	2	13	2
F	Trouble dépressif majeur	67	0													26		37	2	2	5	2
F	Trouble dépressif majeur	67	999	1	4.6	4.38	3.11	1.7	5	16	9	5	13	48	0	20	23	35	4	4	17	2
M	Trouble dépressif majeur	67	0	2.62	4.7	4.38	4.22	4.3								16	28	32	5	2	18	2
M	Trouble dépressif majeur	67	1	3.25	4.3	2	4.22	4.5	7	9	13	5	6	40	0	11	25	29		2	13	2
M	Trouble dépressif majeur	67	1	2.75	3.8	3.13	3.56	2.6	5	5	5	5	5	25	3	9		24	4	2	17	2
F	Trouble dépressif majeur	67	0	1.5	3.8	4.25	2.78	2.3	6	11	5	5	8	35	0	17	26	25	4	2	14	2
F	Trouble dépressif majeur	66	0	1.87	4.4	4.13	4.33	2	5	18	6	5	7	41	0	21		33	4	2	12	2
F	Trouble dépressif majeur	66	999	4	3.9			3.6	9	7	8	5	7	36	1	19	26	28	4	2	5	2
F	Trouble dépressif majeur	66	999						5	14	5	5	5	34	0	18	23	30		2	12	2
M	Trouble dépressif majeur	66	999	3.87	3.5	3.88	3.44	3.4	5	8	6	5	5	29	1	10	24	27	5	2	12	2
F	Trouble dépressif majeur	66	1	2.37	3.9	4.25	3.67	3.4	7	10	6	5	8	36	0	14	26	18		2	14	2
F	Trouble dépressif majeur	66	0	1.5	4.1	3.88	2.56	3	9	15	13	21	20	78	1	13	23			4	5	2
M	Trouble dépressif majeur	66	0	3.87	4.1	4	3.33	4.2	5	19	6	5	11	46	0	14	26	28	4	4	17	2
M	Trouble dépressif majeur	65	1	2.5	4.2	4	3.22	3.5	5	9	9	6	6	35	0	18	17	29	4	2	12	2
F	Trouble dépressif majeur	65	999	3.5	4.4	2.38	3.67	3.5	5	9	5	5	5	29	3	4	36	15	5	1	14	1
M	Trouble dépressif majeur	65	999	4.25	4.4	4.5	2.56	4.6	6	9	8	5	10	38	0	20	24	15		2	17	2
M	Trouble dépressif majeur	65	1	1.87	3.8	3.88	2.56	2.2	5	10	11	5	6	37	0	13	21	31	4	2	12	2
M	Trouble dépressif majeur	65	1	2.37	3.9	3.5	4	3.2	6	11	9	5	7	38	0	20	25	26	4	2		2
F	Trouble dépressif majeur	64	0	3.25	4.9	3.88	4.11	4.1	5	9	5	5	8	32	2	19	16	28	4	2	13	2
M	Trouble dépressif majeur	64	0	1.87	4.9	4	3.67	3.3	5	12	9	5	9	40	0	24	24	36	4	1	13	6
M	Trouble dépressif majeur	64	0	1.37	4.5	4.63	3.78	3.4	5	13	9	5	5	37	0	12	25		4
F	Trouble dépressif majeur	64	999	2	4.3	3.38	2.89	2.8	5	14	9	7	10	45	0	17	24	26	3	2	14	0
F	Trouble dépressif majeur	64	0	1.37	4	3.25	4.33	2.7	5	10	5	5	5	30	0	20	15	42	3	2	8	5
F	Trouble dépressif majeur	64	0	1.75	4.6	3.5	2.89	2.9	7	21	6	5	14	53	0	21	23	26	5	1	16	2
F	Trouble dépressif majeur	64	0						5	9	11	5	9	39	1	20		31	4	4	16	2
F	Trouble dépressif majeur	64	999	3	3.5	2.88	2.67	1.8	6	14	13	5	7	45	1	22	21	38	4	2	9	2
F	Trouble dépressif majeur	63	0	2.25	4.3	3.75	3.67	3	5	9	5	5	5	29	3	12	24	22	5	3	9	2
M	Trouble dépressif majeur	63	0	2.5	4.1	3.5	4.11	3.1	5	13	5	5	9	37	0	21	19	34		2	20	2
F	Trouble dépressif majeur	63	0	2	4.3	4.13	3.67	2.2	5	18	15	5	22	65	1	21	22	23	4
F	Trouble dépressif majeur	63	0	2.62	4.9	3.5	4.89	1.7	5	13	8	5	5	36	1	20	10	43	4	2	5	2
F	Trouble dépressif majeur	63	999	1.62	4.3			1.6	5	16	13	7	9	50	0	17	10	44	4	2	8	5
F	Trouble dépressif majeur	63	999
M	Trouble dépressif majeur	63	0	1.25	3.9	4.13	2.33	3	5	16	6	5	9	41	0	18	15	27		1	16	4
F	Trouble dépressif majeur	63	1															23
M	Trouble dépressif majeur	63	0						5	6	5	5	5	26	0	13		27	4	2	19	1
F	Trouble dépressif majeur	62	0						5	14	6	5	9	39	0	15		23
M	Trouble dépressif majeur	62	0	2.5	3.8	4.25	4.22	2.8	5	13	9	5	5	37	0	11	24	11	4	2	14	2
F	Trouble dépressif majeur	62	1						5	8	5	5	6	29	1	19		30	5	2	16	2
M	Trouble dépressif majeur	62	0													26				4	16	0
F	Trouble dépressif majeur	62	0						5	13	10	5	5	38	0		31	24	3	2	14	2
F	Trouble dépressif majeur	62	0	3.25	4	3.75	4.44	2	5	9	9	5	6	34	2	12	27	28	4	2	13	2
F	Trouble dépressif majeur	62	0						5	5	5	5	5	25	2	18		28	5	2	12	2
F	Trouble dépressif majeur	61	0	3	4	4.75	4.67	2.9	5	12	5	5	7	34	0	17	15	27	4	1	20	4
F	Trouble dépressif majeur	61	0	3.37	4.5	3.38	4.56	4	5	17	7	5	17	51	1	18	25	20	4	2	12	2
F	Trouble dépressif majeur	61	0	2.12	4.3	4.63	3	3.9	9	18	9	5	17	58	0	23	15	41	5	3	14	0
F	Trouble dépressif majeur	61	0	1.25	4.3			3.4								14	21	21	4	4	19	4
F	Trouble dépressif majeur	61	0	2.62	4.6	3.88	3.44	2.8									22	14	4
M	Trouble dépressif majeur	61	0	3.75	4.2	2.38	4.78	4.8	5	5	7	5	5	27	3	1	36	11		1	9	0
M	Trouble dépressif majeur	61	1	2.87	3.4	2.25	3.11	2.8	6	10	5	5	6	32	0	17	36	22	4	2	9	2
M	Trouble dépressif majeur	60	0	3.37	4.8	3	4.44	3.3	7	16	6	5	10	44	0	22	34	28	4	2	19	1
F	Trouble dépressif majeur	60	0	1.37	4.6	3.5	3.56	2.6	5	7	5	5	5	27	1	20	19	38	4	1	20	6
F	Trouble dépressif majeur	60	0	2.87	4.3	3.25	3.67	3.8	8	7	5	5	7	32	0	8	32	22	3	2	18	5
F	Trouble dépressif majeur	60	0						5	6	5	5	9	30	1	14		26	4	2	16	1
F	Trouble dépressif majeur	60	0	2.25	3.7	4.13	2.22	2.1	5	22	8	5	11	51	0	20	10	44	4	4	16	2
F	Trouble dépressif majeur	60	999	1	4.9	4.5	2.11	1.6								18	10	31
